# Supplementary material for: Sodium alginate-based coaxial fibers synergistically integrate moisture actuation, length tracing, humidity sensing, and electric heating
Source: Royal Society of Chemistry journal article supplement (doi:10.1039/d4mh00631c), 2024-01-01
Supplement: d4mh00631c3.pdf [file d4mh00631c3.pdf]

## Supporting Information

# **Sodium Alginate-Based Coaxial Fibers Synergistically Integrate Moisture Actuation, Length Tracing, Humidity Sensing, and Electric Heating**

Lizhong Dong,<sup>a</sup> Ming Ren,<sup>a</sup> Yulian Wang,<sup>a</sup> Xiaojie Yuan,<sup>a</sup> Xiaobo Wang,<sup>ab</sup> Guang Yang,<sup>ab</sup> Yuxin Li,<sup>ab</sup>  
Wei Li,<sup>a</sup> Yunfeng Shao,<sup>ab</sup> Guanlong Qiao,<sup>a</sup> Weiwei Li,<sup>a</sup> Hongli Sun,<sup>a</sup> Jiangtao Di,<sup>\*ab</sup> Qingwen Li<sup>ab</sup>

<sup>a</sup>Advanced Materials Division, Key Laboratory of Multifunctional Nanomaterials and Smart Systems,  
Suzhou Institute of Nano-Tech and Nano-Bionics, Chinese Academy of Sciences, Suzhou 215123, China

<sup>b</sup>School of Nano-Technology and Nano-Bionics, University of Science and Technology of China, Hefei  
230026, China

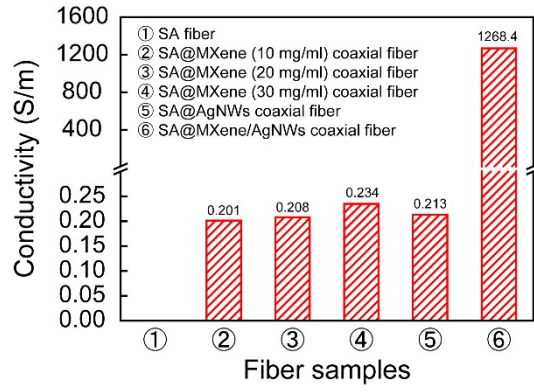

**Fig. S1.** Conductivity of different fiber samples.

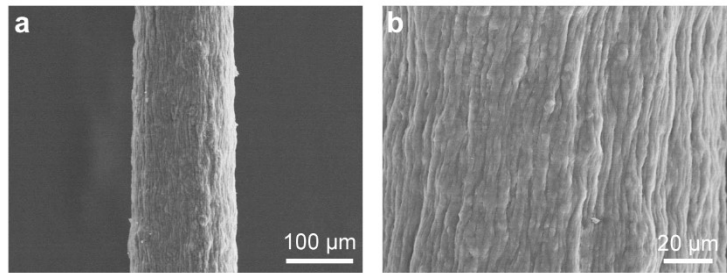

**Fig. S2.** SEM images of the SA fiber (159.82 μm in diameter).

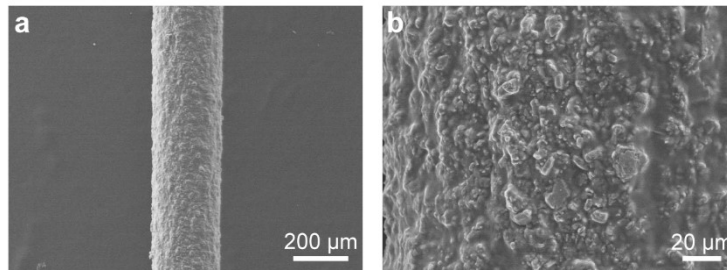

**Fig. S3.** SEM images of the SA@MXene coaxial fiber (264.42 μm in diameter).

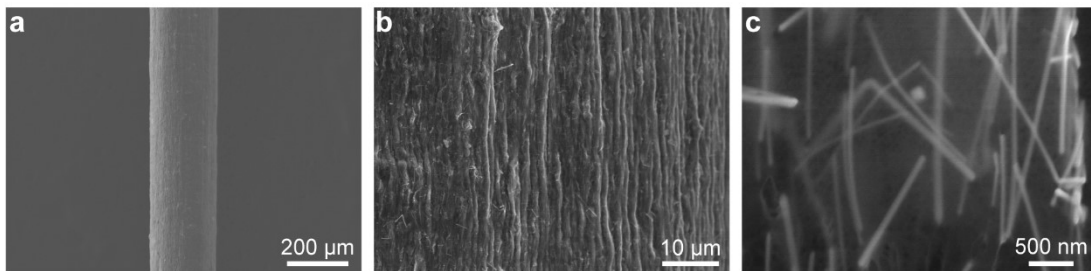

**Fig. S4.** SEM images of the SA@AgNWs coaxial fiber (248.88  $\mu\text{m}$  in diameter).

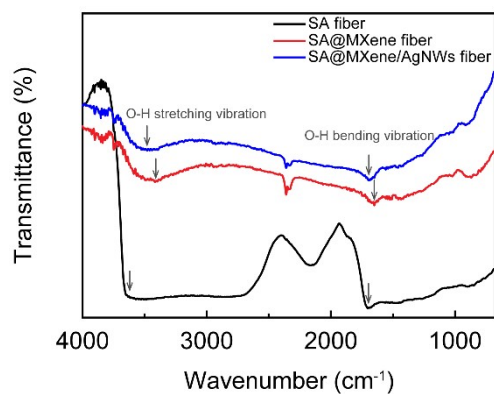

**Fig. S5.** FTIR spectra of the SA fiber, SA@MXene coaxial fiber, and SA@MXene/AgNWs coaxial fiber.

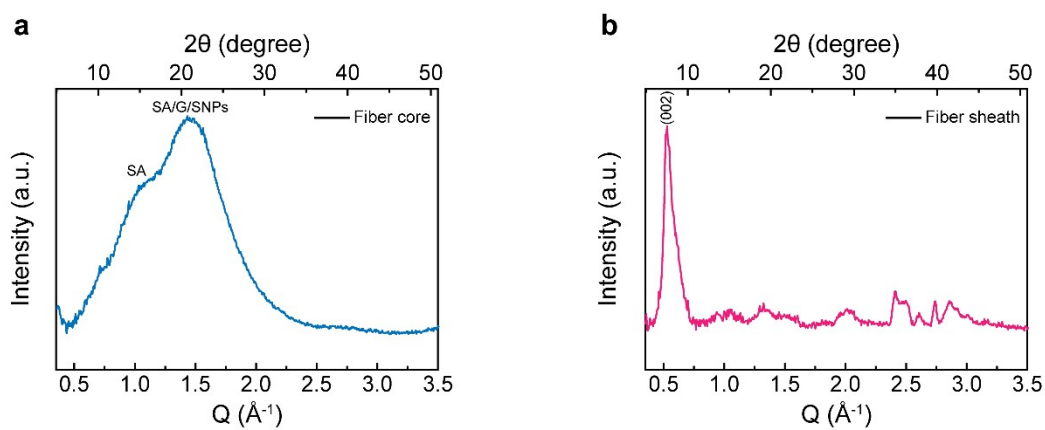

**Fig. S6** WAXS patterns. (a) Fiber core. (b) Fiber sheath.

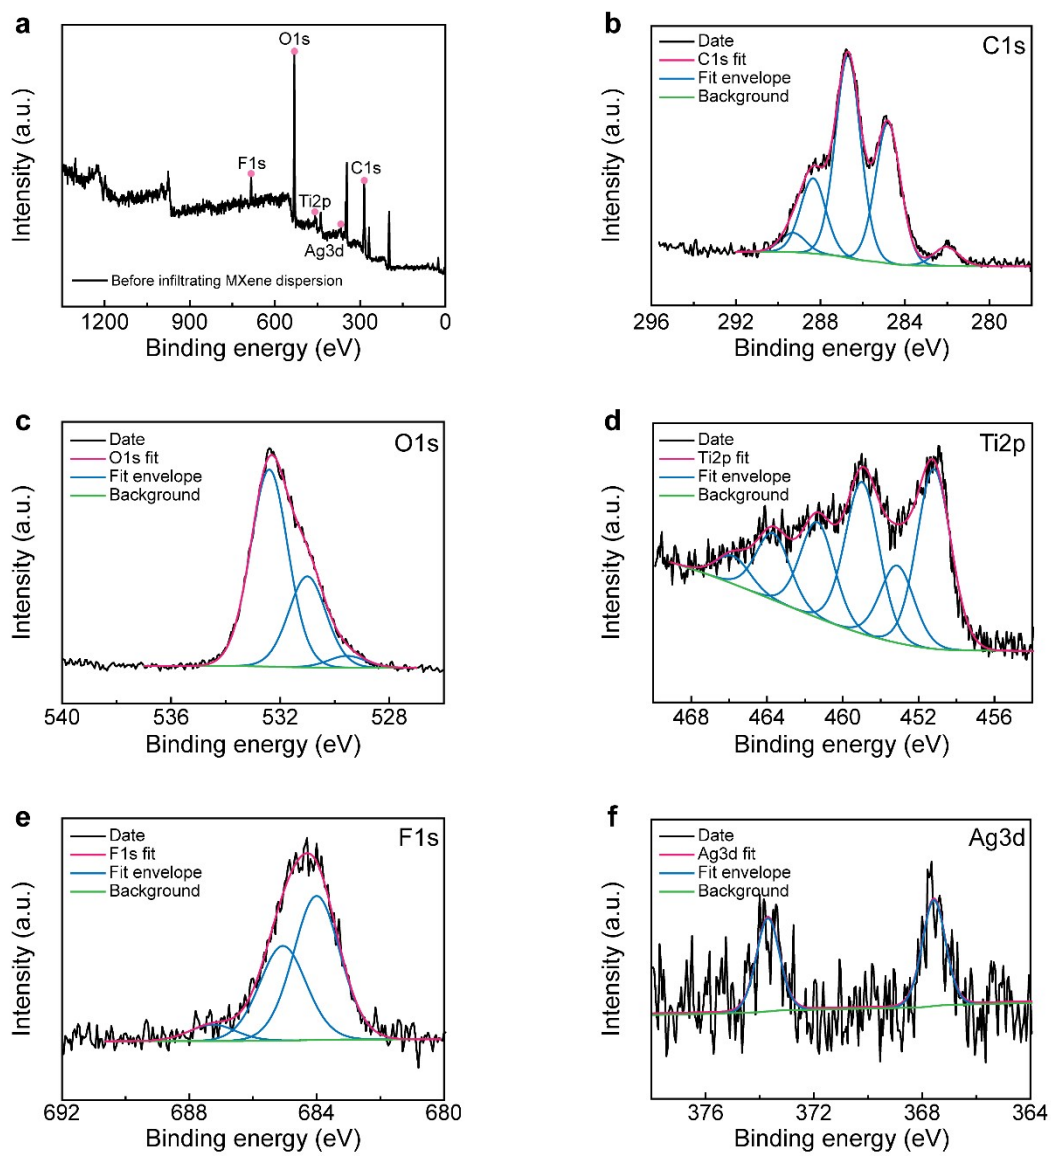

**Fig. S7.** XPS spectra of the coaxial fiber before infiltrating the MXene dispersion. (a) Full region. (b) C1s region. (c) O1s region. (d) Ti2p region. (e) F1s region. (f) Ag3d region.

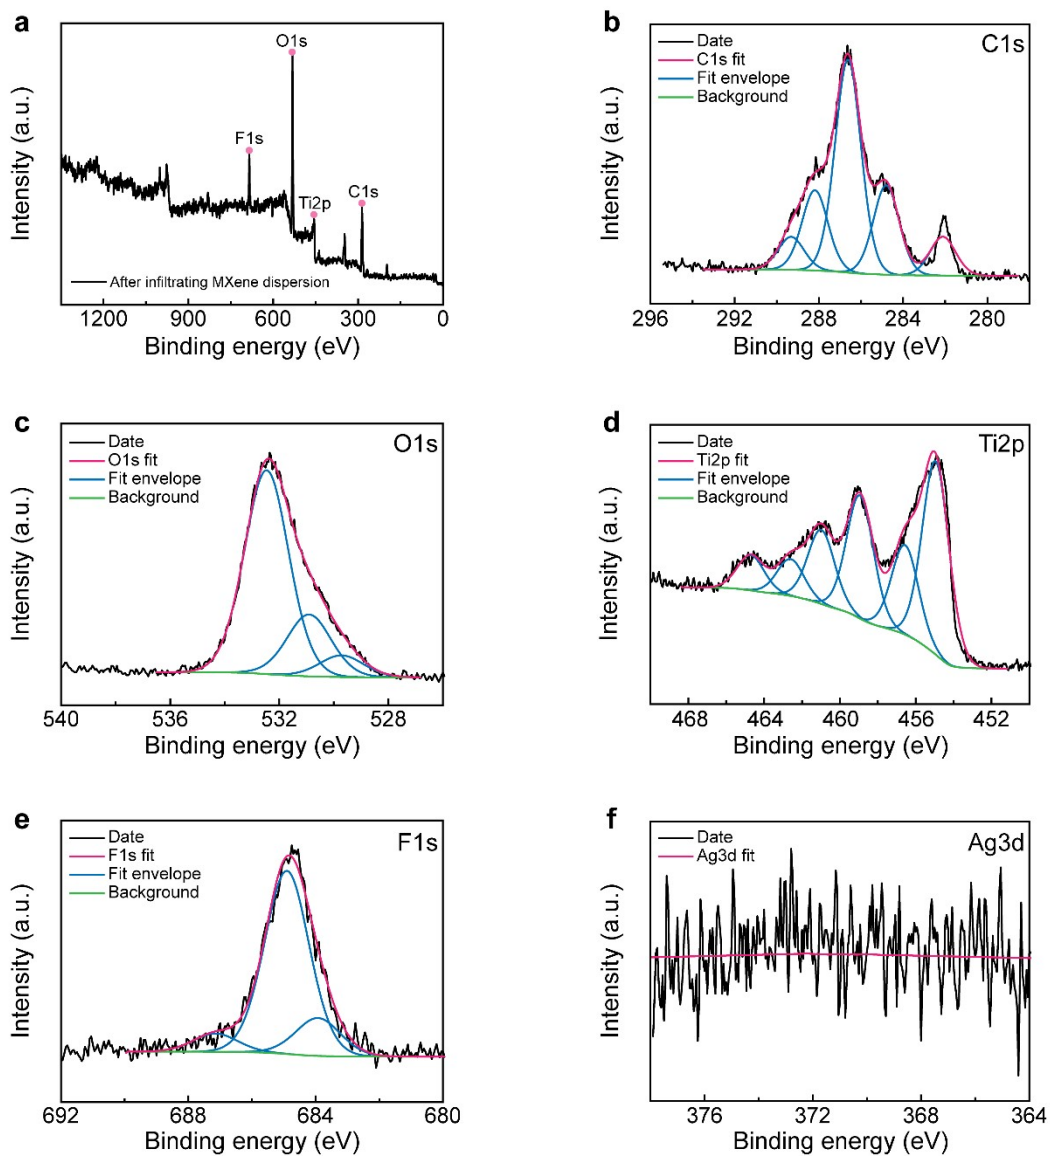

**Fig. S8.** XPS spectra of the coaxial fiber after infiltrating the MXene dispersion. (a) Full region. (b) C1s region. (c) O1s region. (d) Ti2p region. (e) F1s region. (f) Ag3d region.

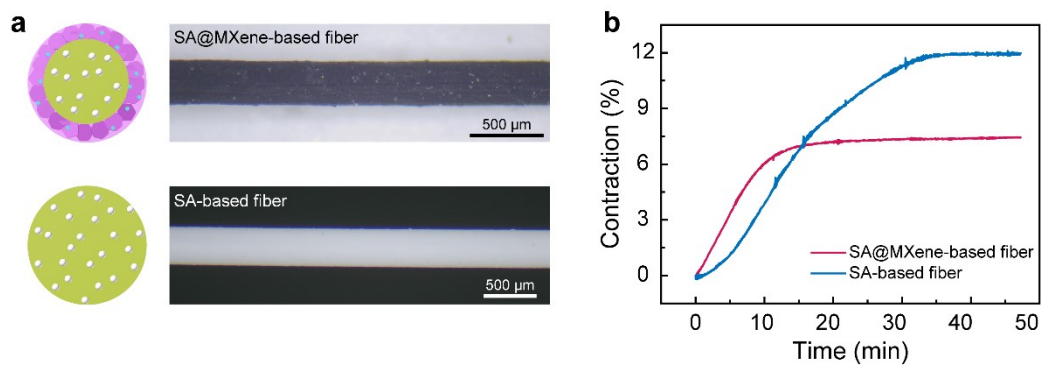

**Fig. S9.** Comparison of water molecule transport speed between the SA@MXene coaxial fiber and SA fiber with the same diameter in air environment.

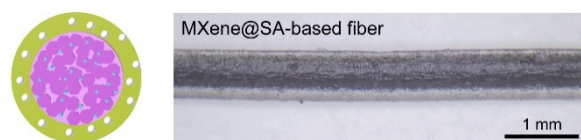

**Fig. S10.** Structure schematic illustration and optical photograph of the MXene@SA coaxial fiber.

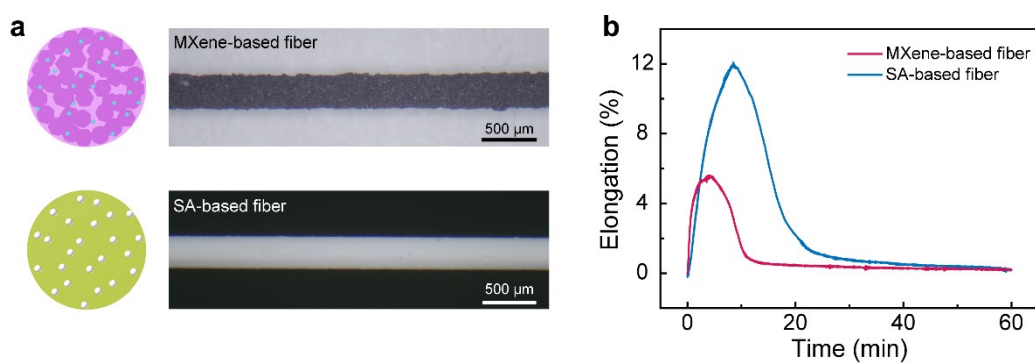

**Fig. S11.** Comparison of elongation between the MXene fiber and SA fiber with the same diameter after absorbing water molecules.

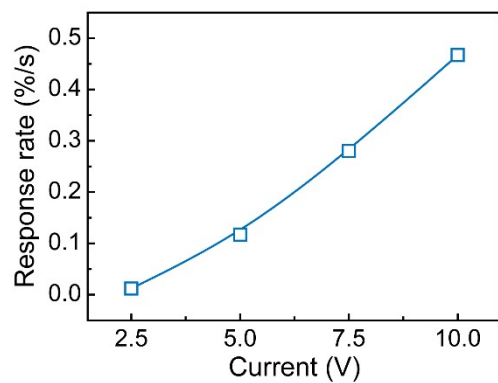

**Fig. S12.** The relationship between contraction response rate and different voltages.

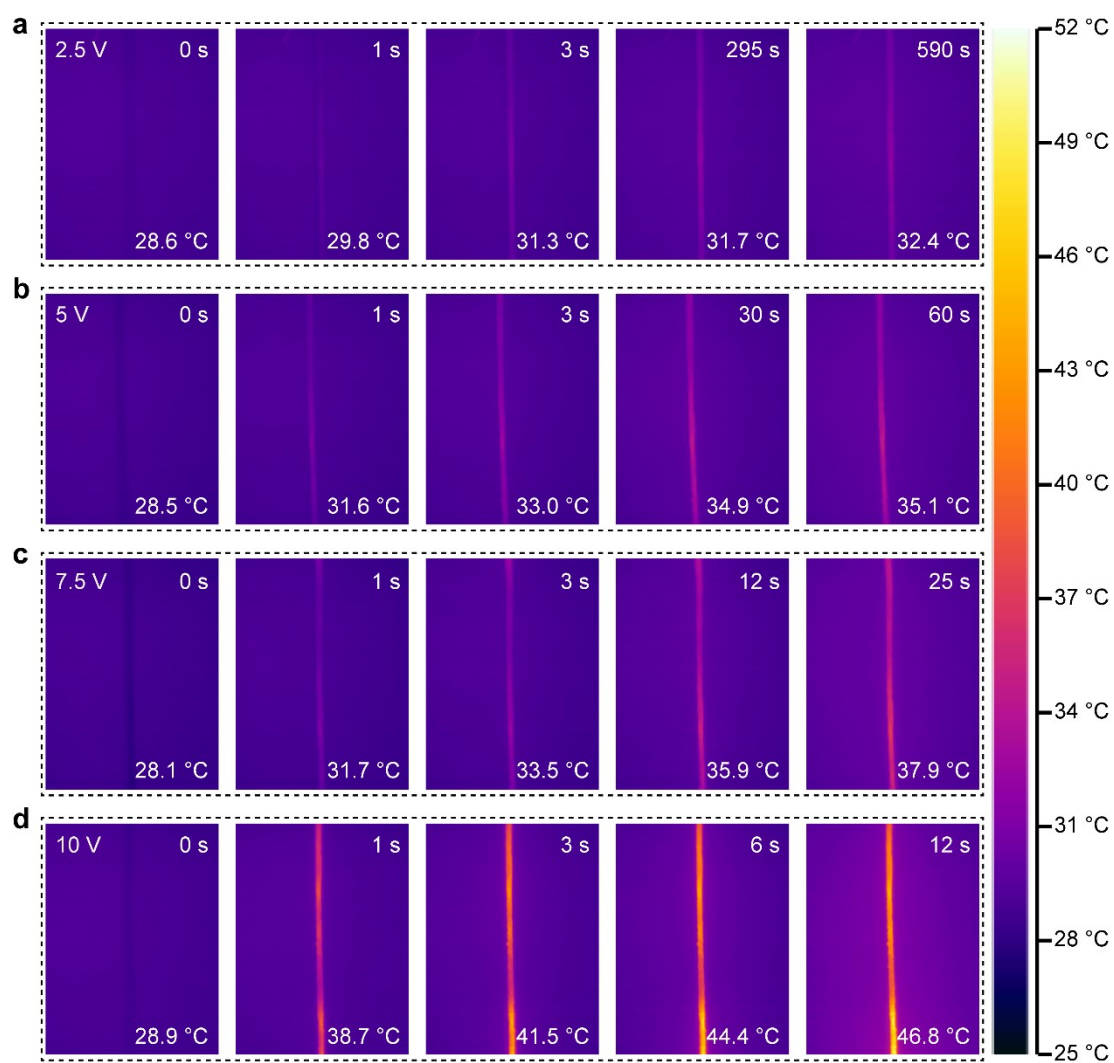

**Fig. S13.** The surface temperature of the coaxial fiber under different voltages during the contracted process. (a) 2.5 V; (b) 5 V; (c) 7.5 V; (d) 10 V.

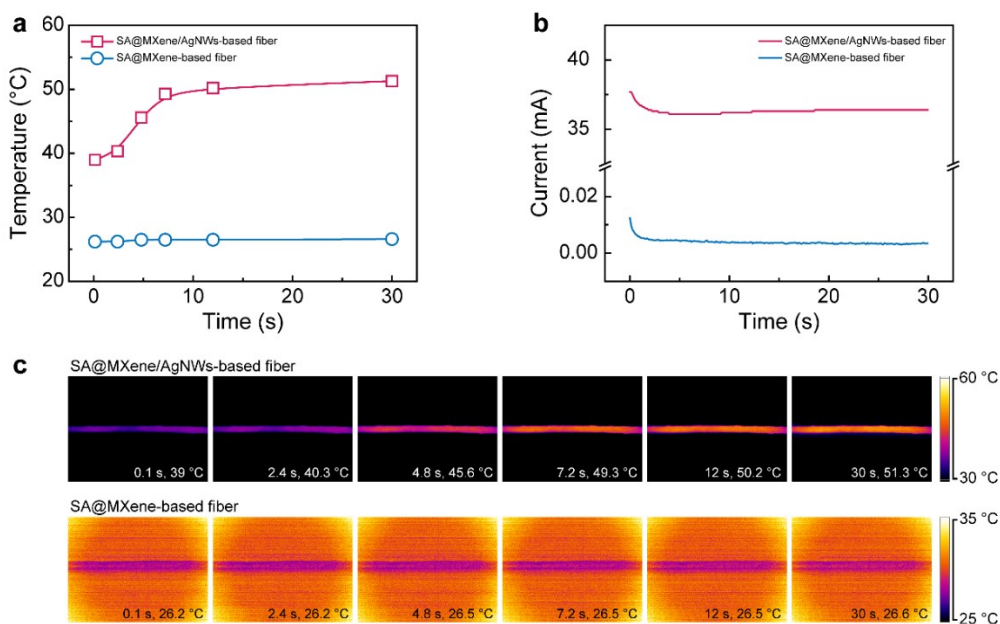

**Fig. S14.** The temperature and current changes of SA@MXene coaxial fibers before and after introducing AgNWs at 10 V voltage. (a) Temperature versus time of different coaxial fibers. (b) Current versus time of different coaxial fibers. (c) IR images at different times.



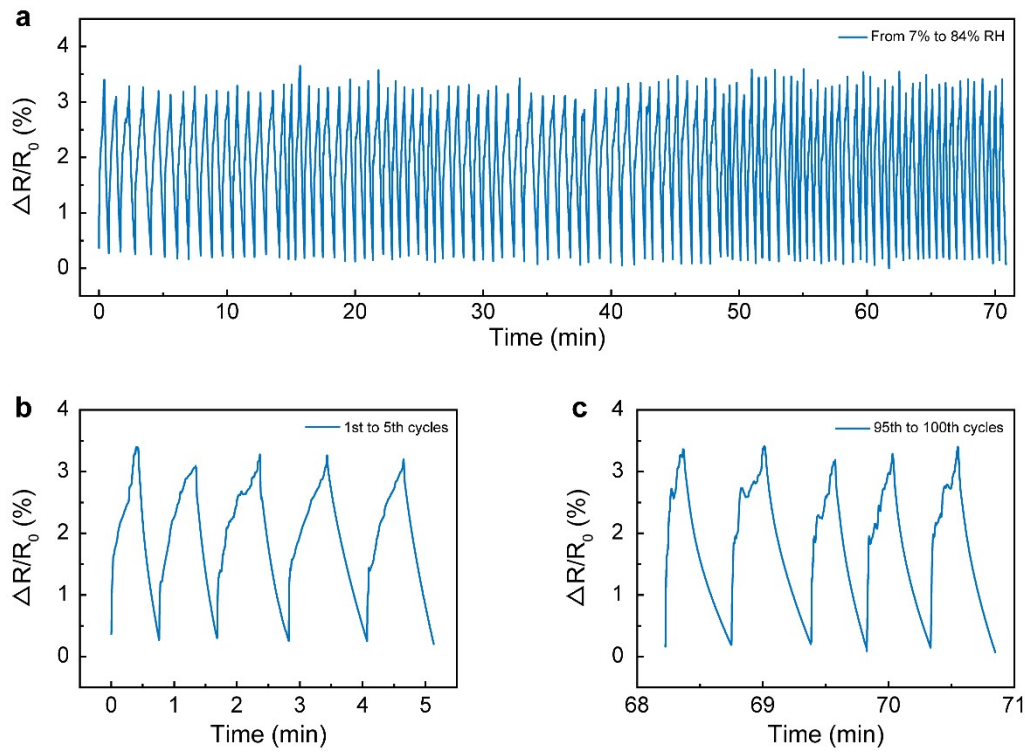

**Fig. S15.** 100 cycles of 7% and 84% RH environment switching test of the coaxial fiber.

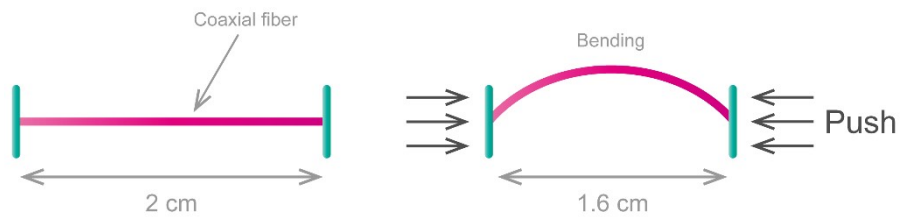

**Fig. S16.** Schematic illustration of the fiber bending test process, distance between the two ends of the pushing device from 2 cm to 1.6 cm.

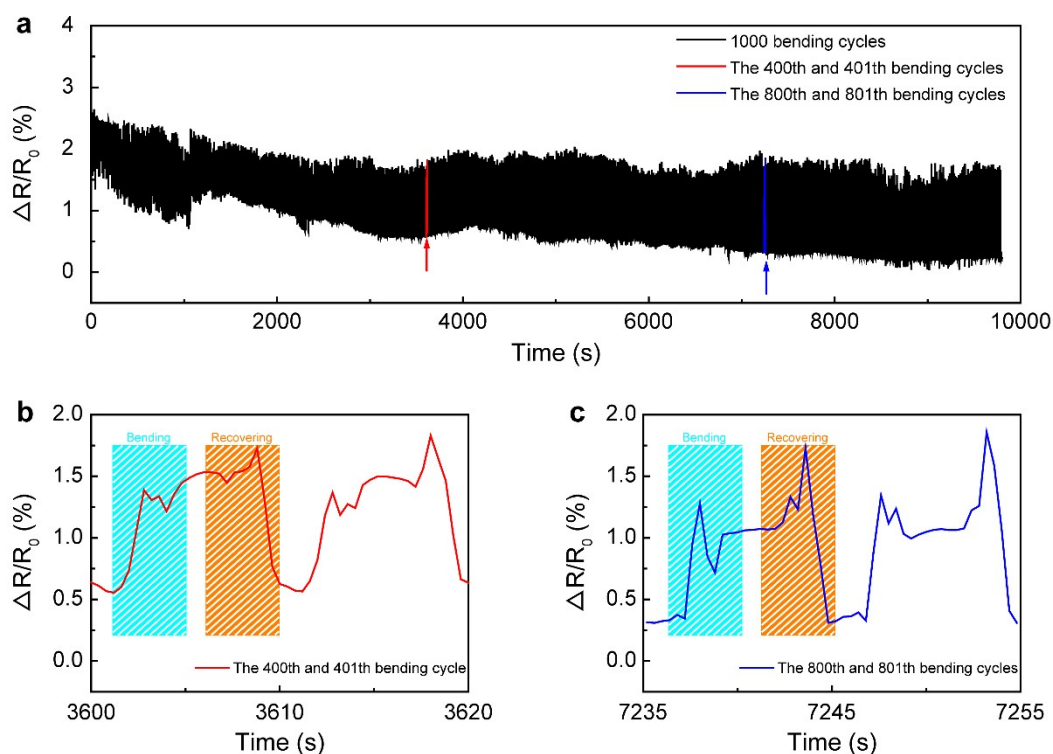

**Fig. S17.** Relative resistance change of the SA@MXene coaxial fiber during bending/recovery process. (a) Relative resistance change of the SA@MXene coaxial fiber during the 1000 bending cycles (the change of fiber length from 20 mm to 16 mm). (b) The relative resistance change during the 400th and 401th bending/recovery process. (c) The relative resistance change during the 800th and 801th bending/recovery process.

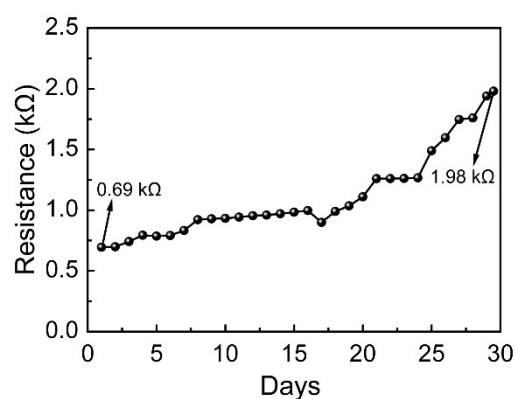

**Fig. S18.** The resistance change of the coaxial fiber (2-cm-long) exposed to the air for 30 days.

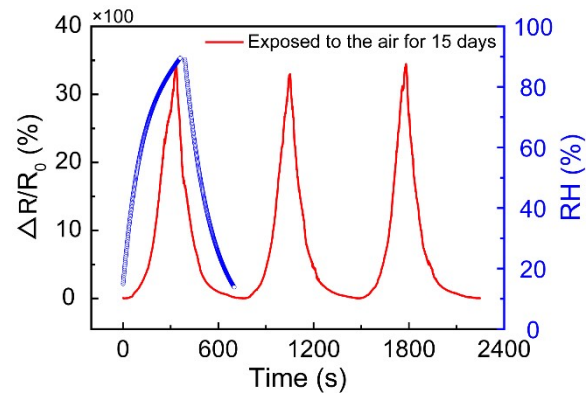

**Fig. S19.** Relative resistance change with RH of the SA@MXene coaxial fiber exposed to the air for 15 days.

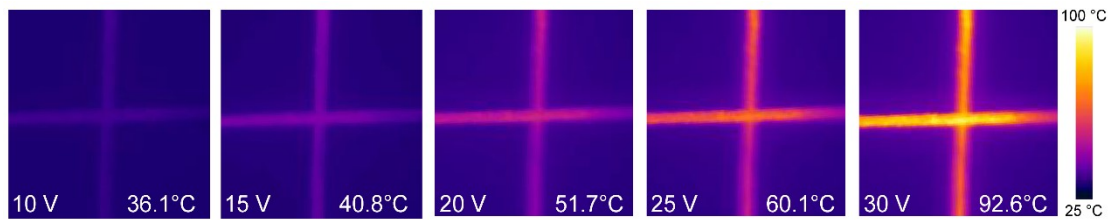

**Fig. S20.** FLIR images of the stable surface temperature of the thermal physiotherapy textile at different voltages (0 V, 10 V, 15 V, 20 V, 25 V, and 30 V).

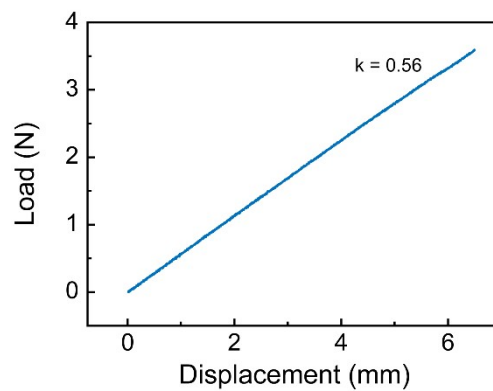

**Fig. S21.** Hooke coefficient of the spring used for the simultaneous testing of length and contractile force.

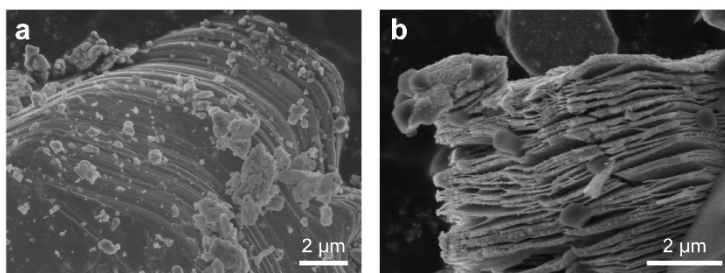

**Fig. S22.** Typical SEM images of the (a) Ti<sub>3</sub>AlC<sub>2</sub> powder and (b) freeze-dried Ti<sub>3</sub>C<sub>2</sub>T<sub>x</sub> powder.

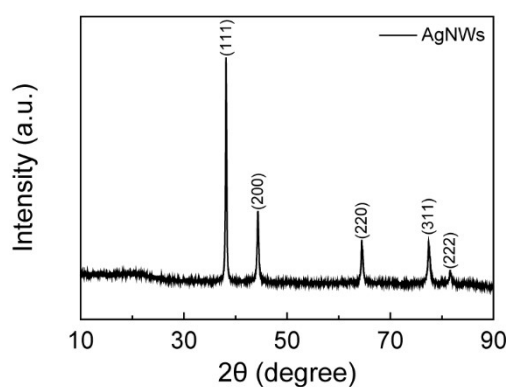

**Fig. S23.** XRD patterns of AgNWs.

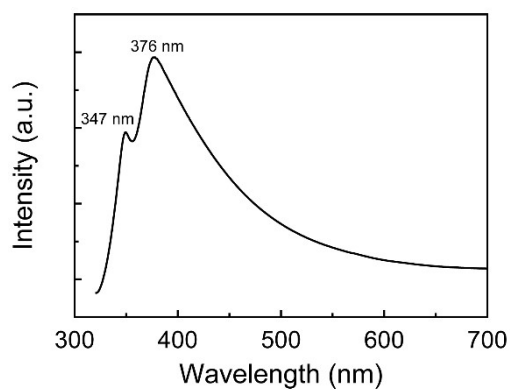

**Fig. S24.** UV-vis absorption spectra of water solution of AgNWs. The AgNWs exhibited a maximum absorption at about 376 nm with a shoulder peak at 347 nm prior to functionalization ( $\Delta\lambda = 2$  nm).

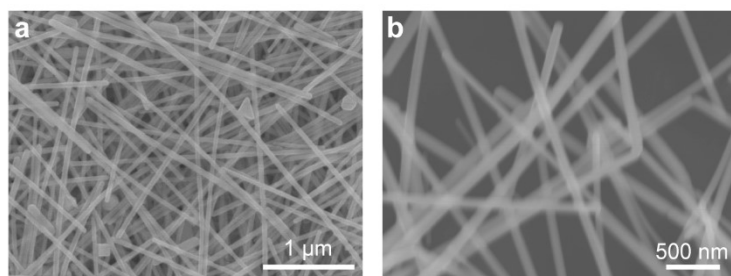

**Fig. S25.** SEM images of AgNWs.

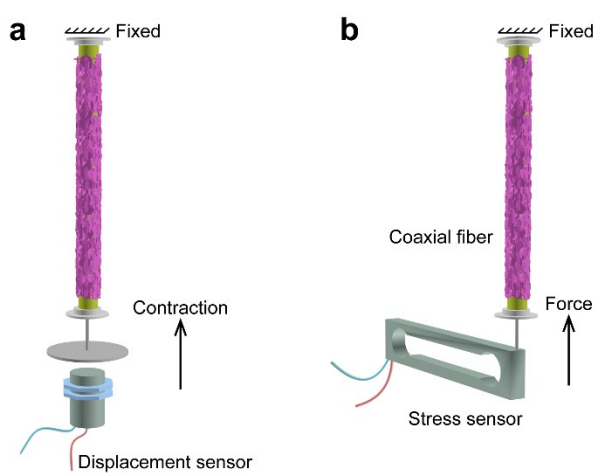

**Fig. S26.** Schematic diagram of the test equipments of (a) actuation stroke and (b) contractile force.

**Table S1.** Components of different fibers.

| The inner core (22 G) |         |            | The outer sheath (17 G) |               |          |
|-----------------------|---------|------------|-------------------------|---------------|----------|
| SA (wt%)              | G (wt%) | SNPs (wt%) | MXene (mg/ml)           | AgNWs (mg/ml) | SA (wt%) |
| 2.5                   | 2.5     | 1          | -                       | -             | -        |
| 2.5                   | 2.5     | 1          | 10                      | -             | 0.5      |
| 2.5                   | 2.5     | 1          | 20                      | -             | 0.5      |
| 2.5                   | 2.5     | 1          | 30                      | -             | 0.5      |
| 2.5                   | 2.5     | 1          | -                       | 5             | 0.5      |
| 2.5                   | 2.5     | 1          | 20                      | 5             | 0.5      |

### **The calculation process of the conductivity of the coaxial fiber:**

The resistivity calculation equation is as follows

$$\rho = RS/l \quad (S1)$$

where R, S, and l represent the resistance, cross-sectional area, and length of the coaxial fiber, respectively.

Since the inner core in the coaxial fiber has no electrical conductivity, the cross-sectional area was rewritten to the following formula

$$S = \pi r_2^2 - \pi r_1^2 \quad (S2)$$

where  $r_1$  and  $r_2$  represent the radius of the inner core fiber and the coaxial fiber, respectively.

The conductivity calculation equation is as follows

$$\sigma = 1/\rho \quad (S3)$$
